# Supplementary material for: Inhibition of the eukaryotic initiation factor-2α kinase PERK decreases risk of autoimmune diabetes in mice
Source: PubMed Central journal article supplement (PMC11324307; doi:10.1172/jci176136), 2024-06-18
Supplement: jci-134-176136-s105.pdf [file jci-134-176136-s105.pdf]

# Inhibition of the Eukaryotic Initiation Factor-2- $\alpha$ Kinase PERK Decreases Risk of Autoimmune Diabetes in Mice

Charanya Muralidharan<sup>1</sup>, Fei Huang<sup>1</sup>, Jacob R. Enriquez<sup>1</sup>, Jiayi E. Wang<sup>1</sup>, Jennifer B. Nelson<sup>1</sup>, Titli Nargis<sup>1</sup>, Sarah C. May<sup>1</sup>, Advaita Chakraborty<sup>1</sup>, Kayla T. Figatner<sup>1</sup>, Svetlana Navitskaya<sup>1</sup>, Cara M. Anderson<sup>1</sup>, Veronica Calvo<sup>2</sup>, David Surguladze<sup>2</sup>, Mark J. Mulvihill<sup>2</sup>, Xiaoyan Yi<sup>3</sup>, Soumyadeep Sarkar<sup>4</sup>, Scott A. Oakes<sup>5</sup>, Bobbie-Jo M. Webb-Robertson<sup>4</sup>, Emily K. Sims<sup>6-8</sup>, Kirk A Staschke<sup>9-10</sup>, Decio L. Eizirik<sup>3</sup>, Ernesto S. Nakayasu<sup>4</sup>, Michael E. Stokes<sup>2</sup>, Sarah A. Tersey<sup>1</sup>, and Raghavendra G. Mirmira<sup>1\*</sup>

<sup>1</sup>Department of Medicine and the Kovler Diabetes Center, The University of Chicago, Chicago, IL, USA

<sup>2</sup>HiberCell Inc., New York, NY, USA

<sup>3</sup>ULB Center for Diabetes Research, Université Libre de Bruxelles, Brussels, Belgium

<sup>4</sup>Biological Sciences Division, Pacific Northwest National Laboratory, Richland, WA, USA

<sup>5</sup>Department of Pathology, The University of Chicago, Chicago, IL, USA

<sup>6</sup>Department of Pediatrics, <sup>7</sup>Center for Diabetes and Metabolic Diseases, <sup>8</sup>Wells Center for Pediatric Research, <sup>9</sup>Department of Biochemistry and Molecular Biology, and <sup>10</sup>Indiana University Melvin and Bren Simon Comprehensive Cancer Center, Indiana University School of Medicine, Indianapolis, IN, USA

\*Corresponding author: Raghavendra G Mirmira, 900 E. 57<sup>th</sup> Street, KCBD 8130, Chicago, IL 60637, USA; email: [mirmira@uchicago.edu](mailto:mirmira@uchicago.edu)

# Figure 1 E: Increase in p-eIF2 $\alpha$ in NSG and pre-diabetic NOD islets

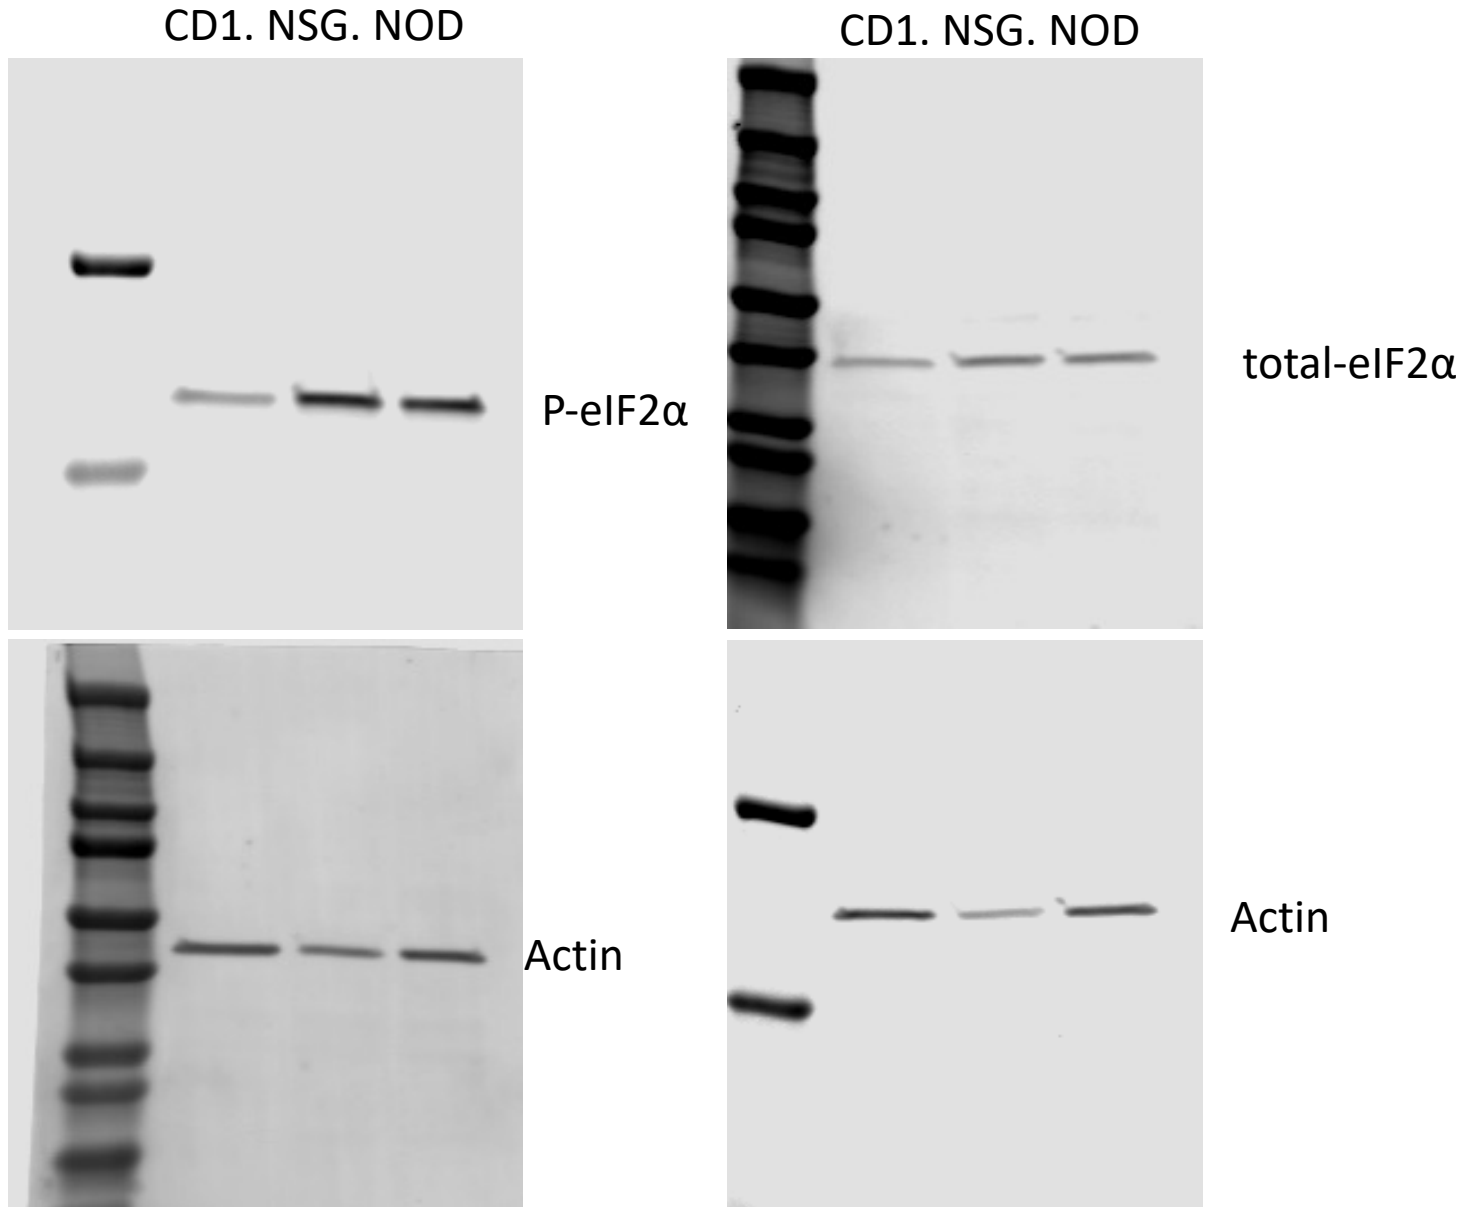

- Islets from 8-10-week-old female CD1, NSG, and NOD mice were isolated, and protein was collected using RIPA lysis buffer
- Probed with rabbit p-eIF2 $\alpha$  and mouse Actin on one blot
- Probed with mouse total eIF2 $\alpha$  and rabbit Actin on another blot
- Ladder used: Precision plus duo

# Figure 1 I: Decrease in protein translation (puromycin incorporation) in NSG and pre-diabetic NOD islets

CD1. NSG. NOD

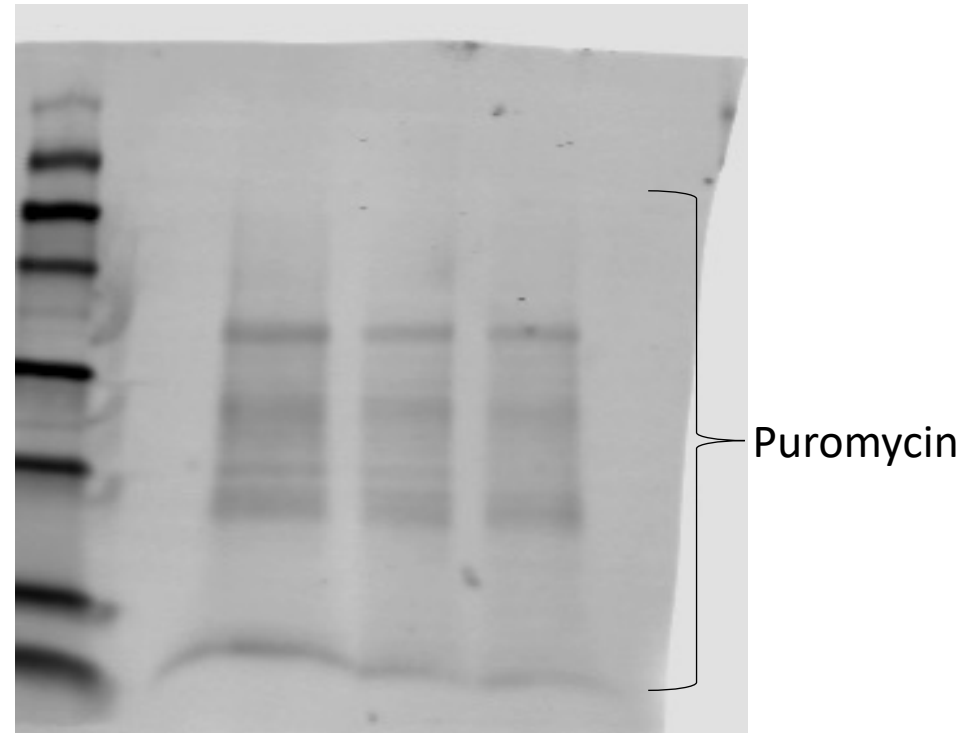

CD1. NSG. NOD

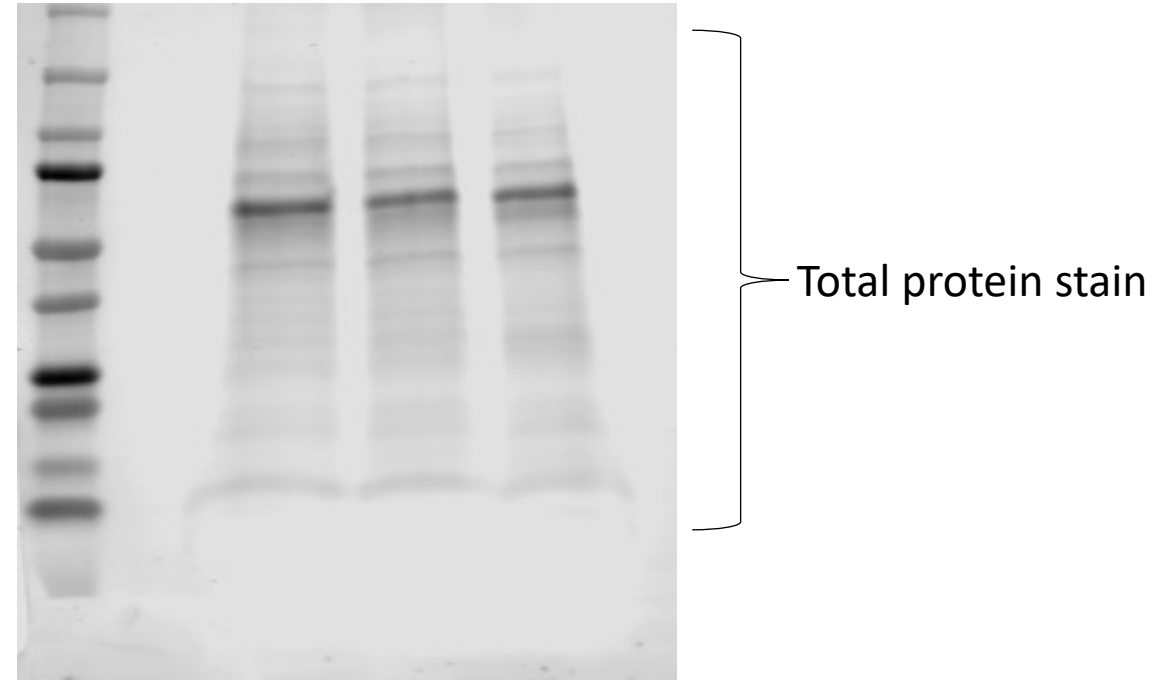

- Islets from 8-week-old female CD1, NSG, and NOD mice were isolated, and protein was collected using RIPA lysis buffer
- Probed with mouse anti-puromycin (left)
- Equal concentration of samples loaded on to a different gel was probed with REVERT total protein stain (right)

# Figure 1 K: Increase in PERK phosphorylation in NSG and pre-diabetic NOD islets

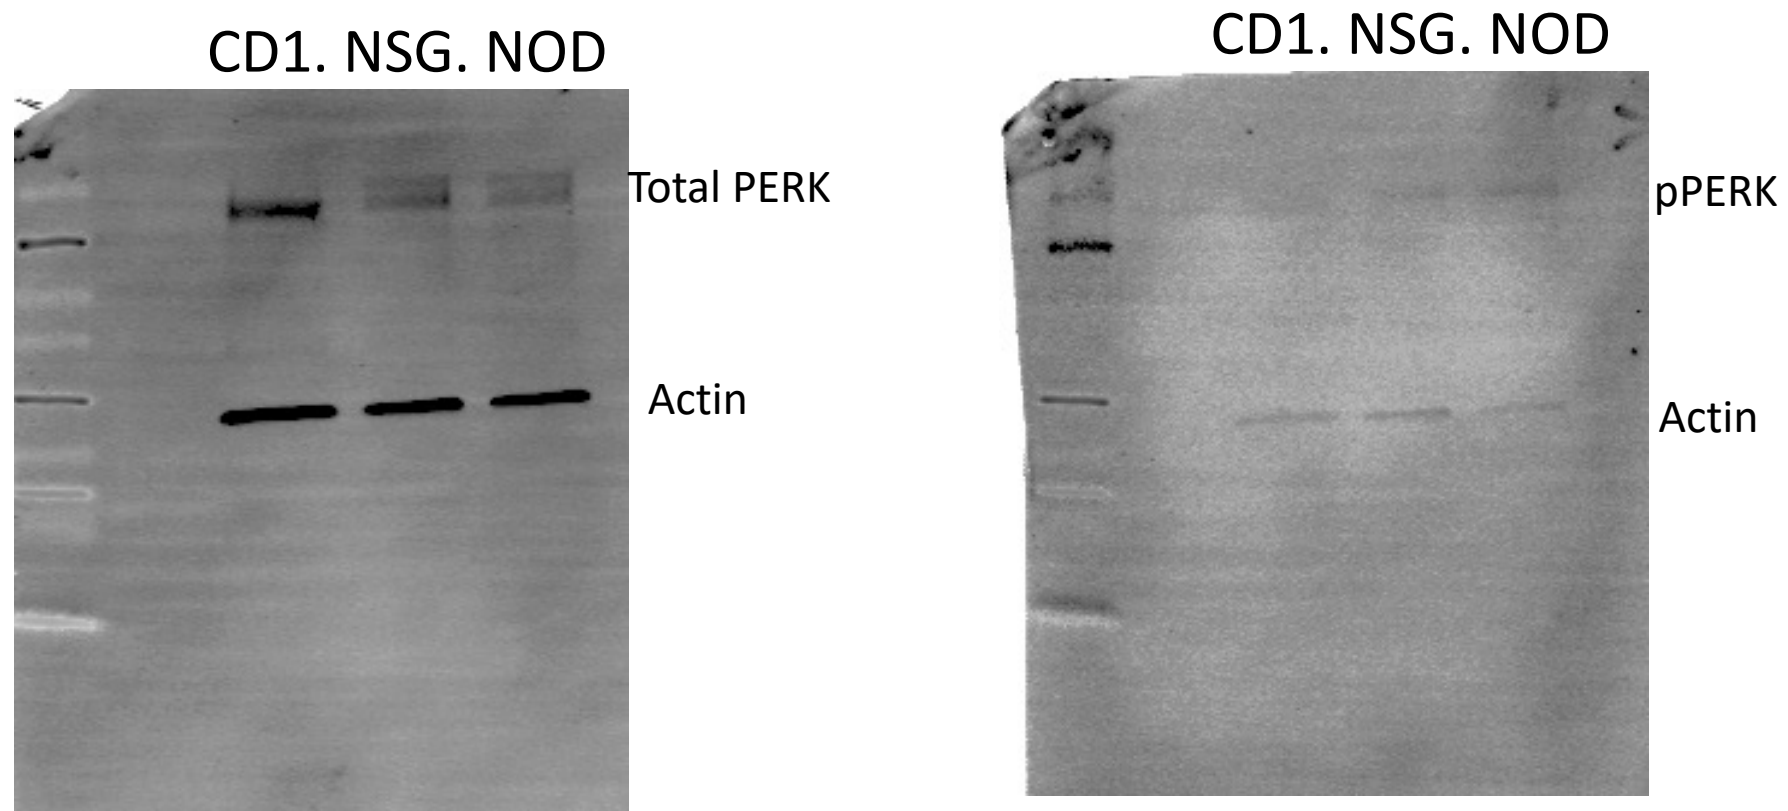

- Islets from 8-week-old female CD1, NSG, and NOD mice were isolated, and protein was collected using RIPA lysis buffer
- Probed with mouse anti-puromycin
- Stripped with Restore stripping buffer and reprobed with rabbit total PERK and rabbit Actin
- Stripped with Restore stripping buffer and reprobed with rabbit pPERK
- Ladder used: Chameleon duo

Figure 1 M: Increase in protein translation (puromycin incorporation) in MIN6 cells treated with HC-5770 or ISRIB in the presence of PIC

|         |   |   |   |   |   |   |
|---------|---|---|---|---|---|---|
| PIC     | - | + | + | + | - | - |
| HC-5770 | - | - | + | - | + | - |
| ISRIB   | - | - | - | + | - | + |

|         |   |   |   |   |   |   |
|---------|---|---|---|---|---|---|
| PIC     | - | + | + | + | - | - |
| HC-5770 | - | - | + | - | + | - |
| ISRIB   | - | - | - | + | - | + |

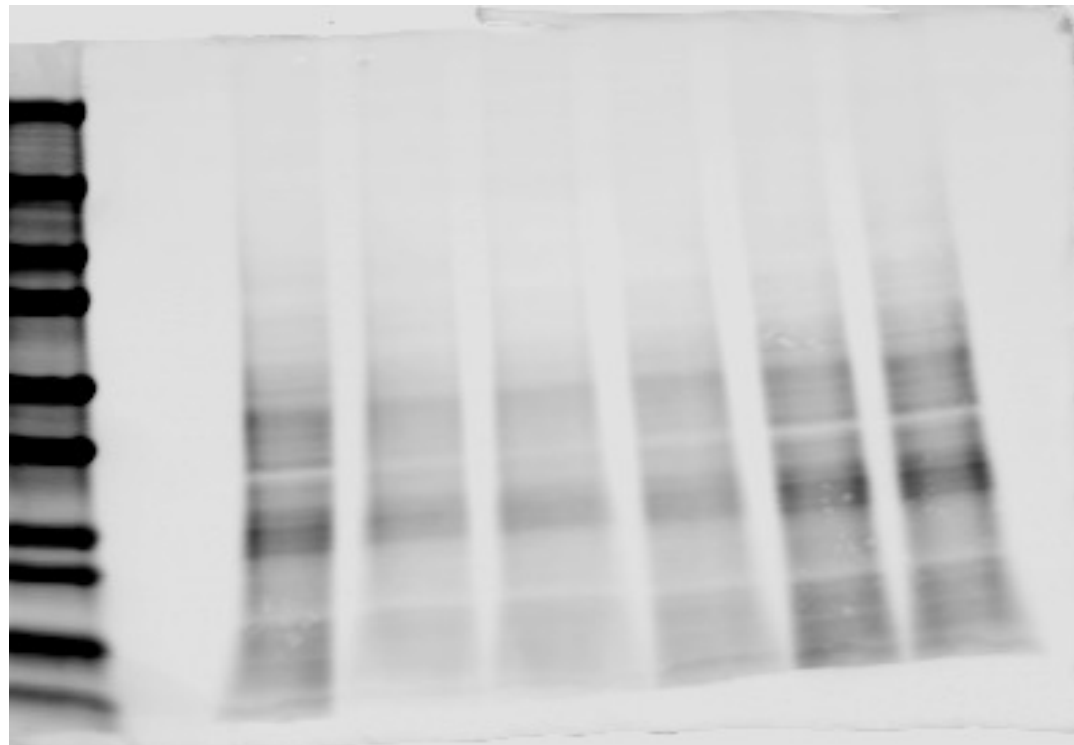

Puromycin

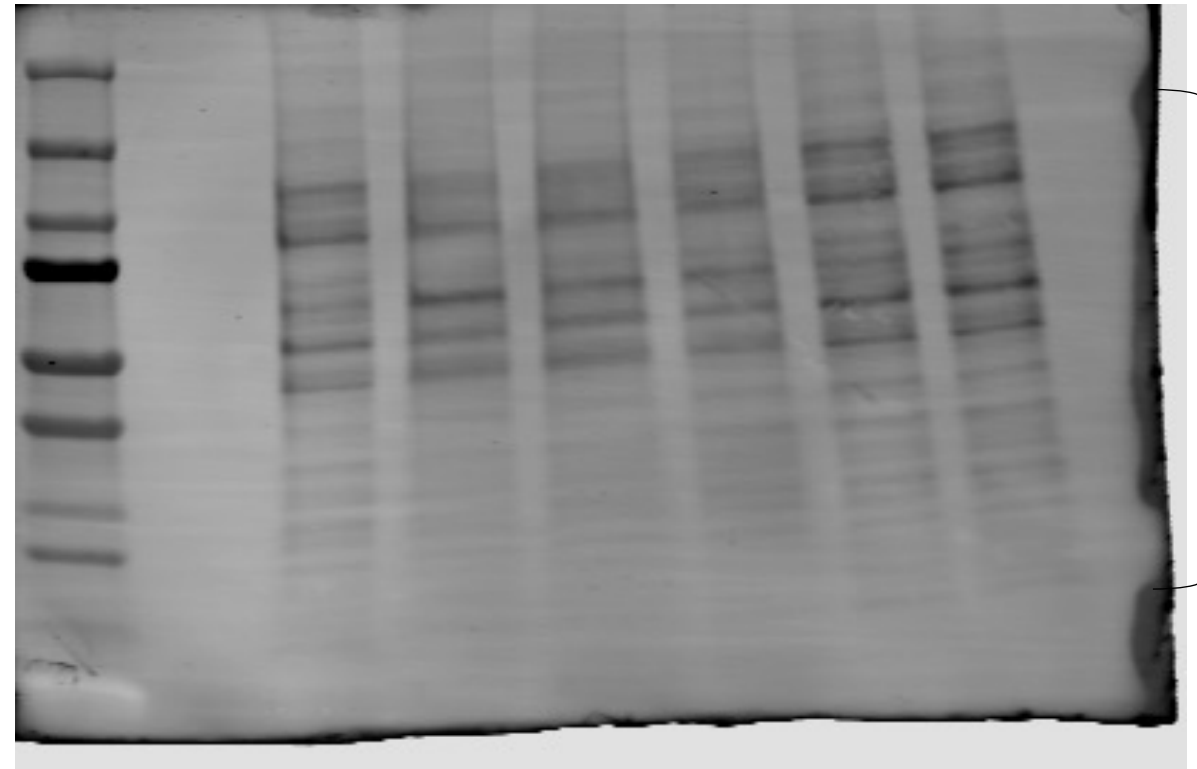

Total protein stain

- MIN6 cells were treated with vehicle or 250nM HC-5770 or 50nM ISRIB +/- proinflammatory cytokine (PIC) cocktail. Following 18-24 hours, cells were washed, and protein was collected using RIPA lysis buffer
- Probed with mouse anti-puromycin; stripped and reprobbed with REVERT total protein stain
- Ladder used: Precision plus duo

Last two lanes are controls that were not included in the main manuscript figure

Figure 4B: EndoC- $\beta$ H1 cells show an increase in PD-L1 and GOLM1 following inhibition of ISR under inflammatory stress

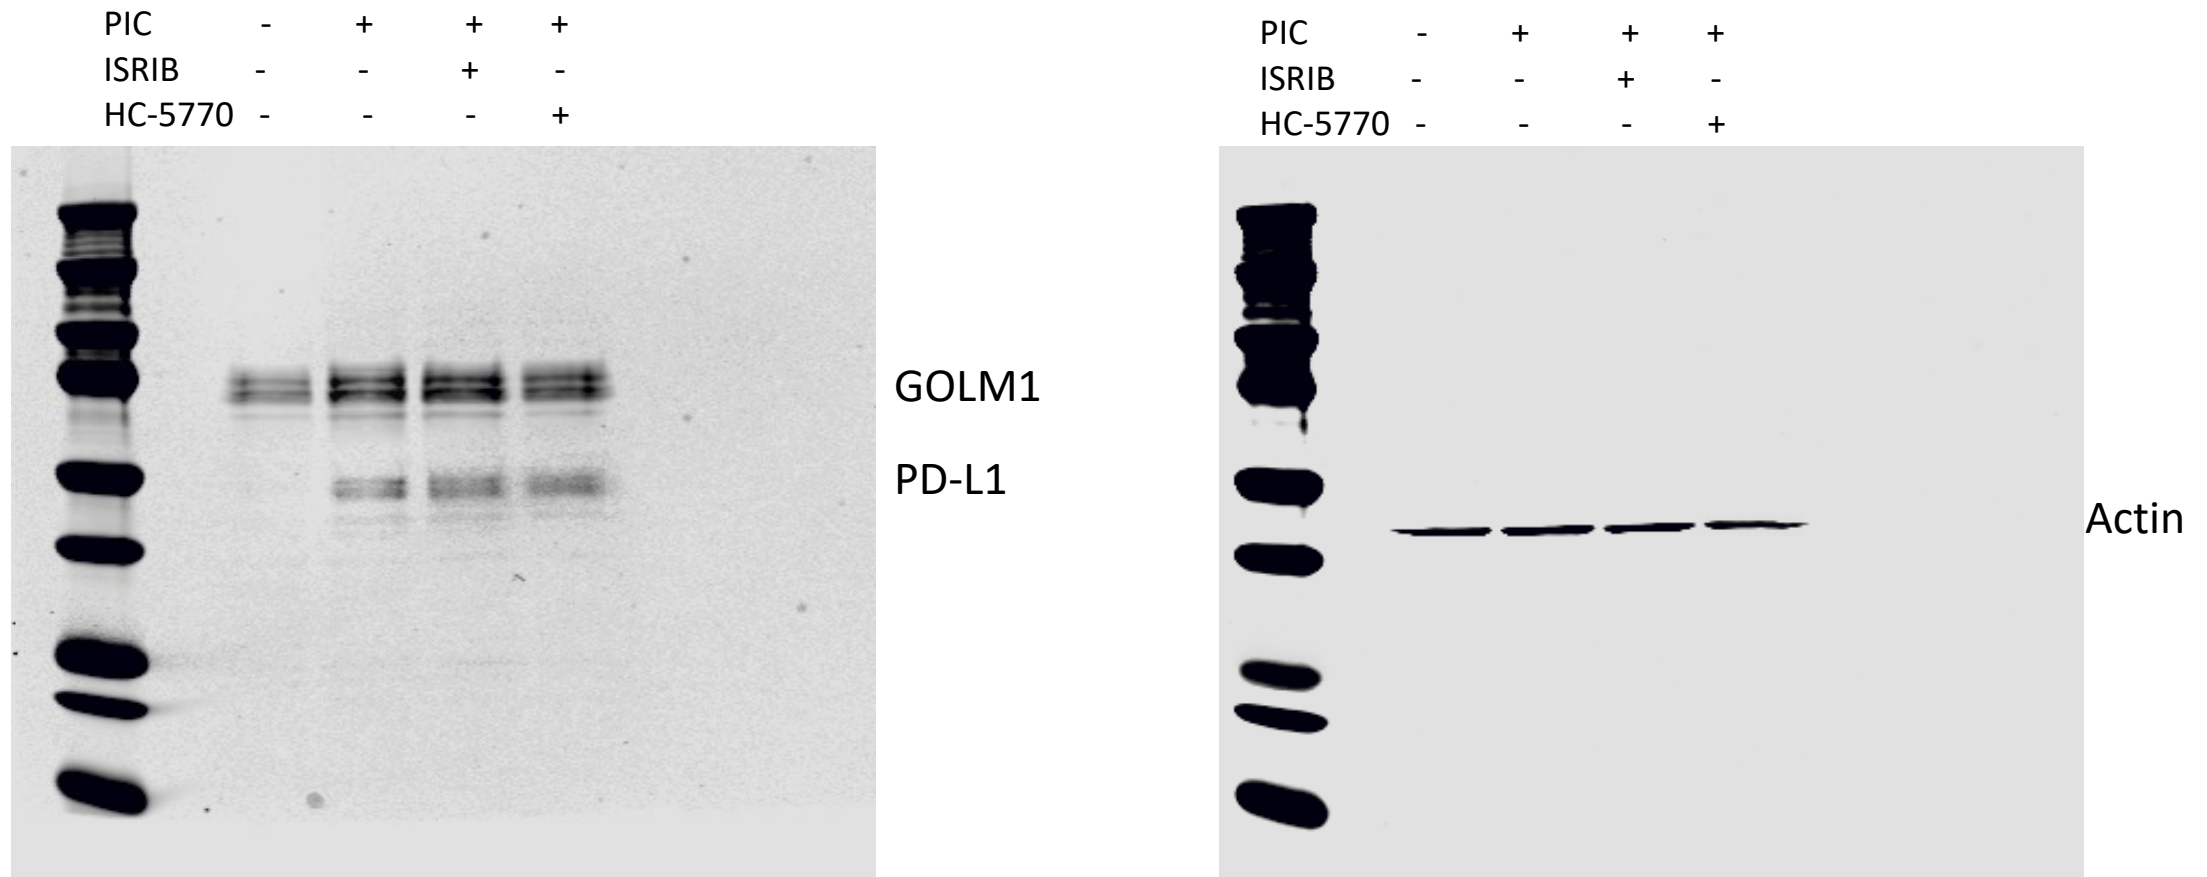

- EndoC- $\beta$ H1 cells were treated with vehicle or 250nM HC-5770 or 50nM ISRIB +/- proinflammatory cytokine (PIC) cocktail. Following 18-24 hours, cells were washed, and protein was collected using RIPA lysis buffer
- Probed with rabbit anti-GOLM1, mouse PD-L1, and mouse Actin
- Ladder used: Precision plus duo

Figure 4F: EndoC- $\beta$ H1 cells show a decrease in PD-L1 levels with *GOLM1* knockdown

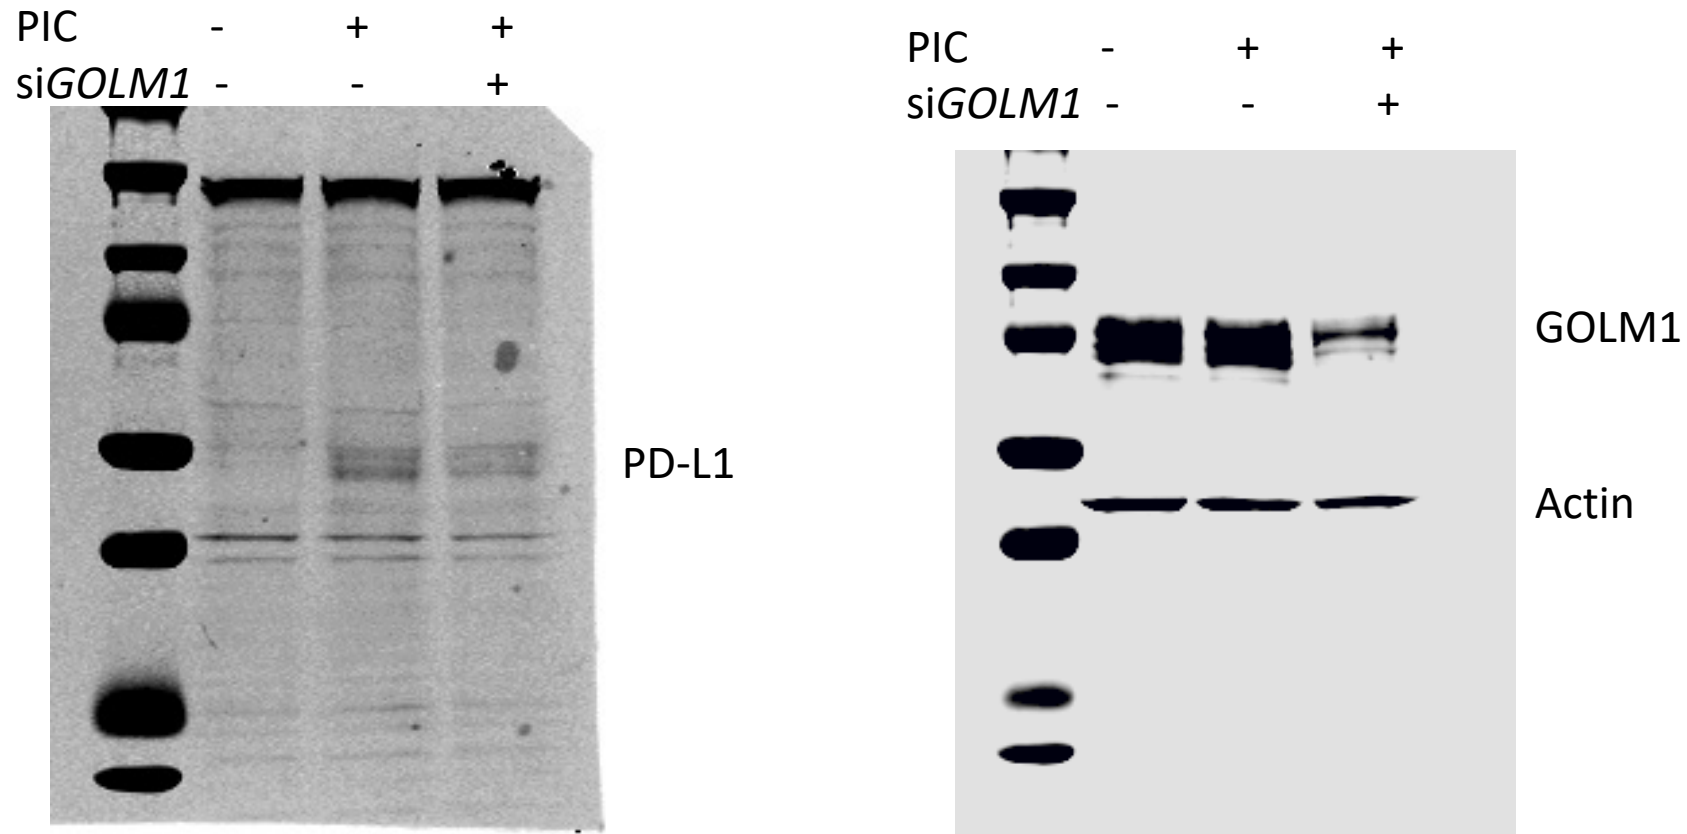

- EndoC- $\beta$ H1 cells were transfected with si*GOLM1* for 96 hours. After 72 hours, cells were treated with Proinflammatory cytokine (PIC) cocktail
- Probed with rabbit anti-GOLM1, mouse PD-L1, and rabbit Actin
- Ladder used: Precision plus duo

Figure 4F: EndoC- $\beta$ H1 cells show a decrease in PD-L1 levels with *GOLM1* knockdown

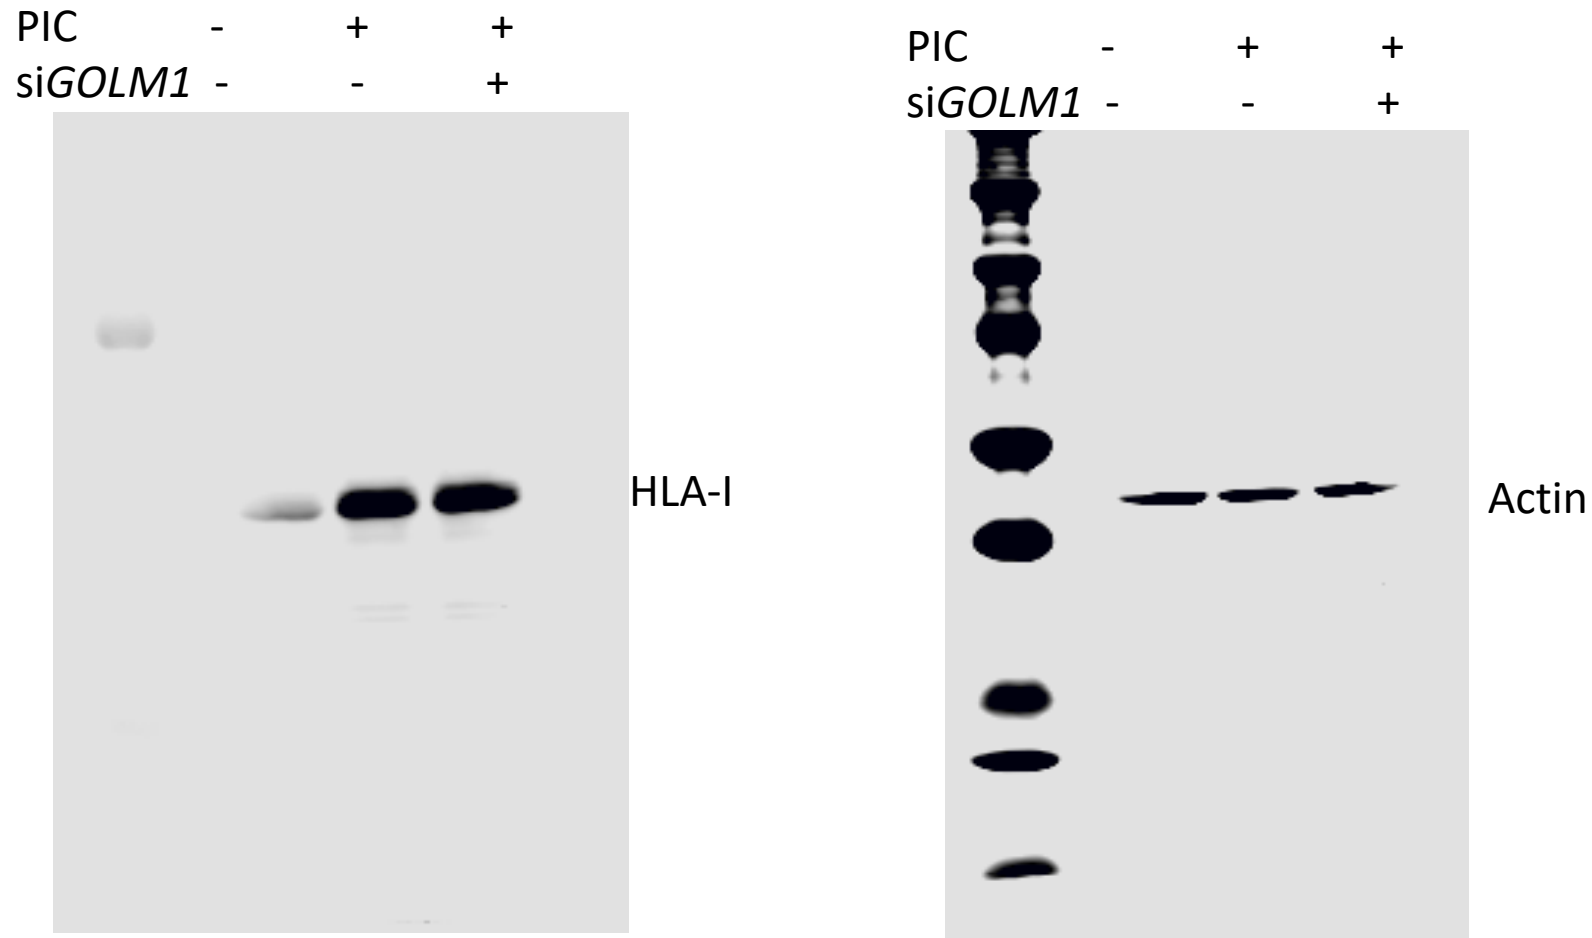

- EndoC- $\beta$ H1 cells were transfected with si*GOLM1* for 96 hours. After 72 hours, cells were treated with Proinflammatory cytokine (PIC) cocktail
- Probed with rabbit anti-HLA-I and mouse Actin
- Ladder used: Precision plus duo



Figure 4J: EndoC- $\beta$ H1 cells show PD-L1 is stabilized by GOLM1 and prevents ubiquitin-based PD-L1 degradation

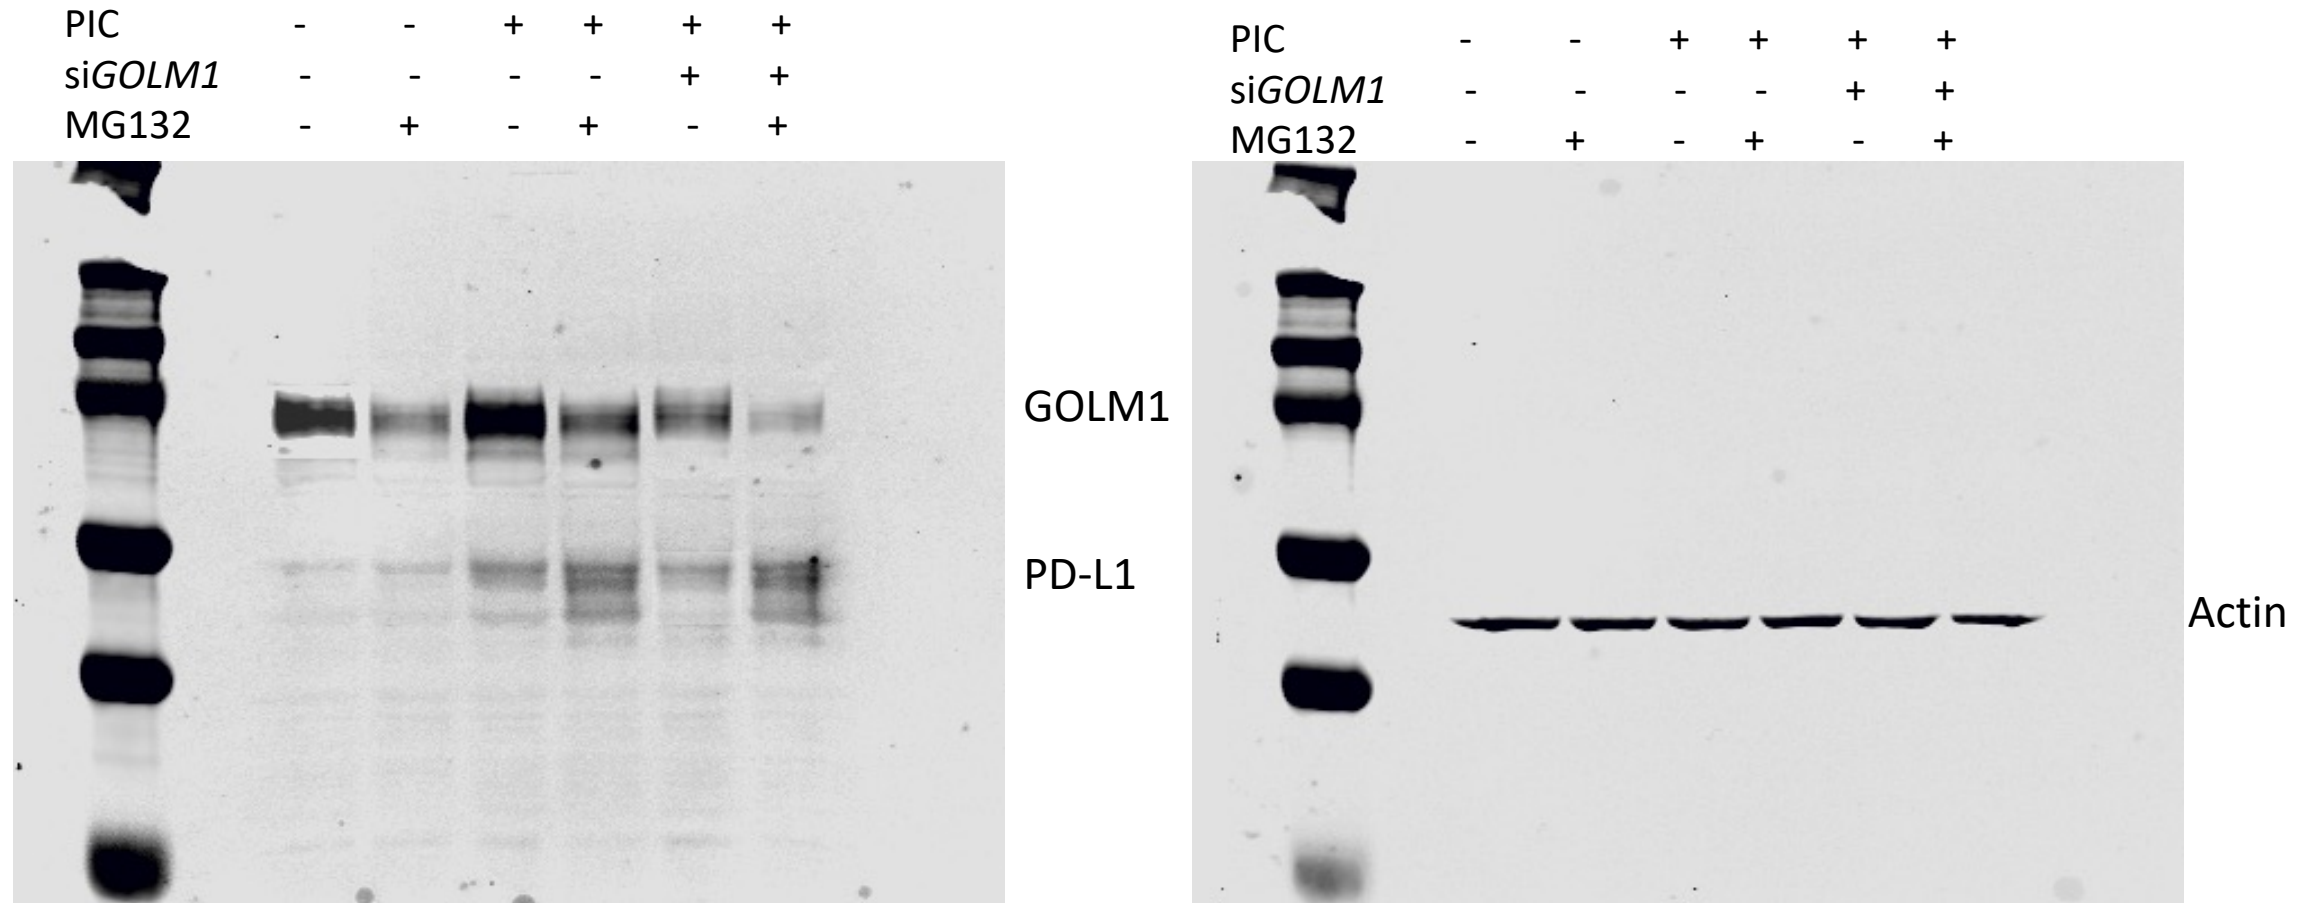

- EndoC- $\beta$ H1 cells were transfected with siGOLM1 for 96 hours. After 72 hours, cells were concurrently treated with Proinflammatory cytokine (PIC) cocktail and 10 $\mu$ M MG132 for 18-24 hours.
- Probed with mouse anti-PD-L1, rabbit anti-GOLM1 and mouse Actin
- Ladder used: Precision plus duo

Figure 4K: HEK-293 cells show an increase in ubiquitination following *GOLM1* knockdown

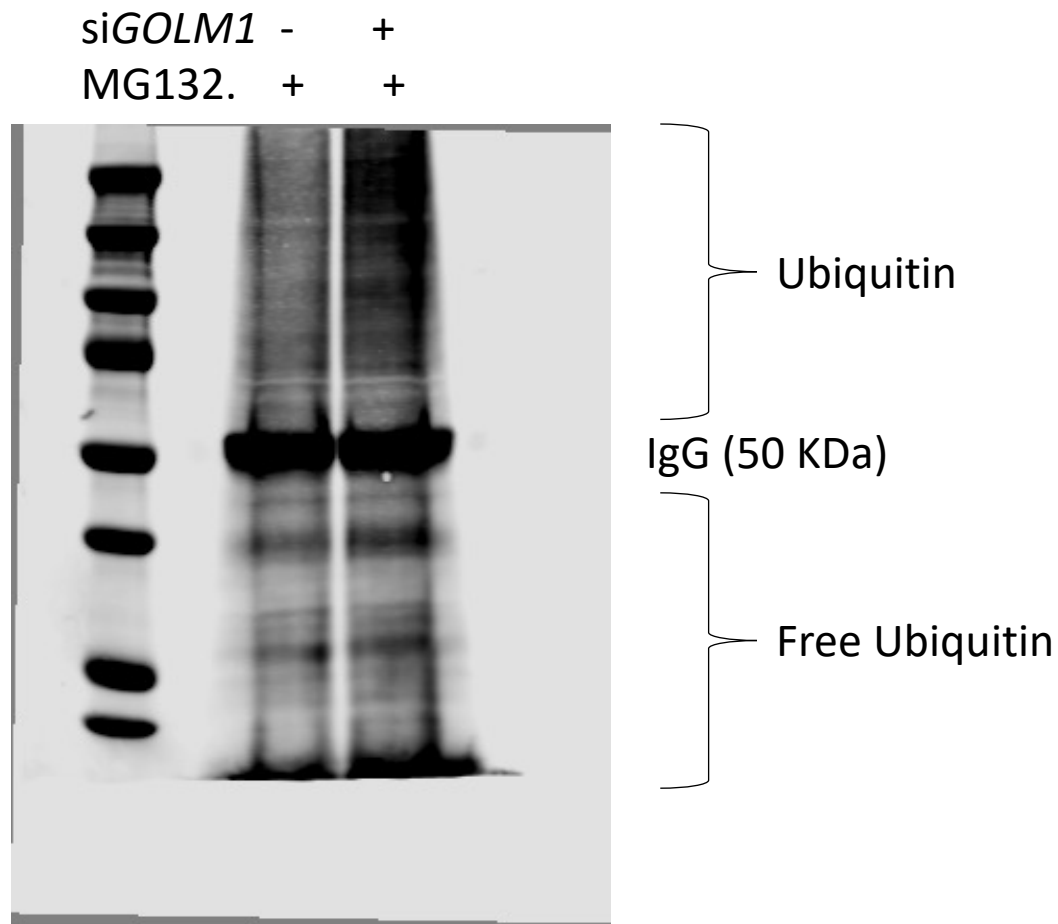

- HEK-293 cells were transfected with si*GOLM1*. After 24 hours, cells were transfected with eGFP-PD-L1 vector. 24 hours later, cells were treated with 10 $\mu$ M MG132 overnight. The following day, cells were harvested and incubated with anti-PD-L1 and resolved using SDS-PAGE.
- Probed with rabbit anti-ubiquitin
- Ladder used: Precision plus duo

Figure 4L: HEK-293 cells show interaction between GOLM1 and PD-L1

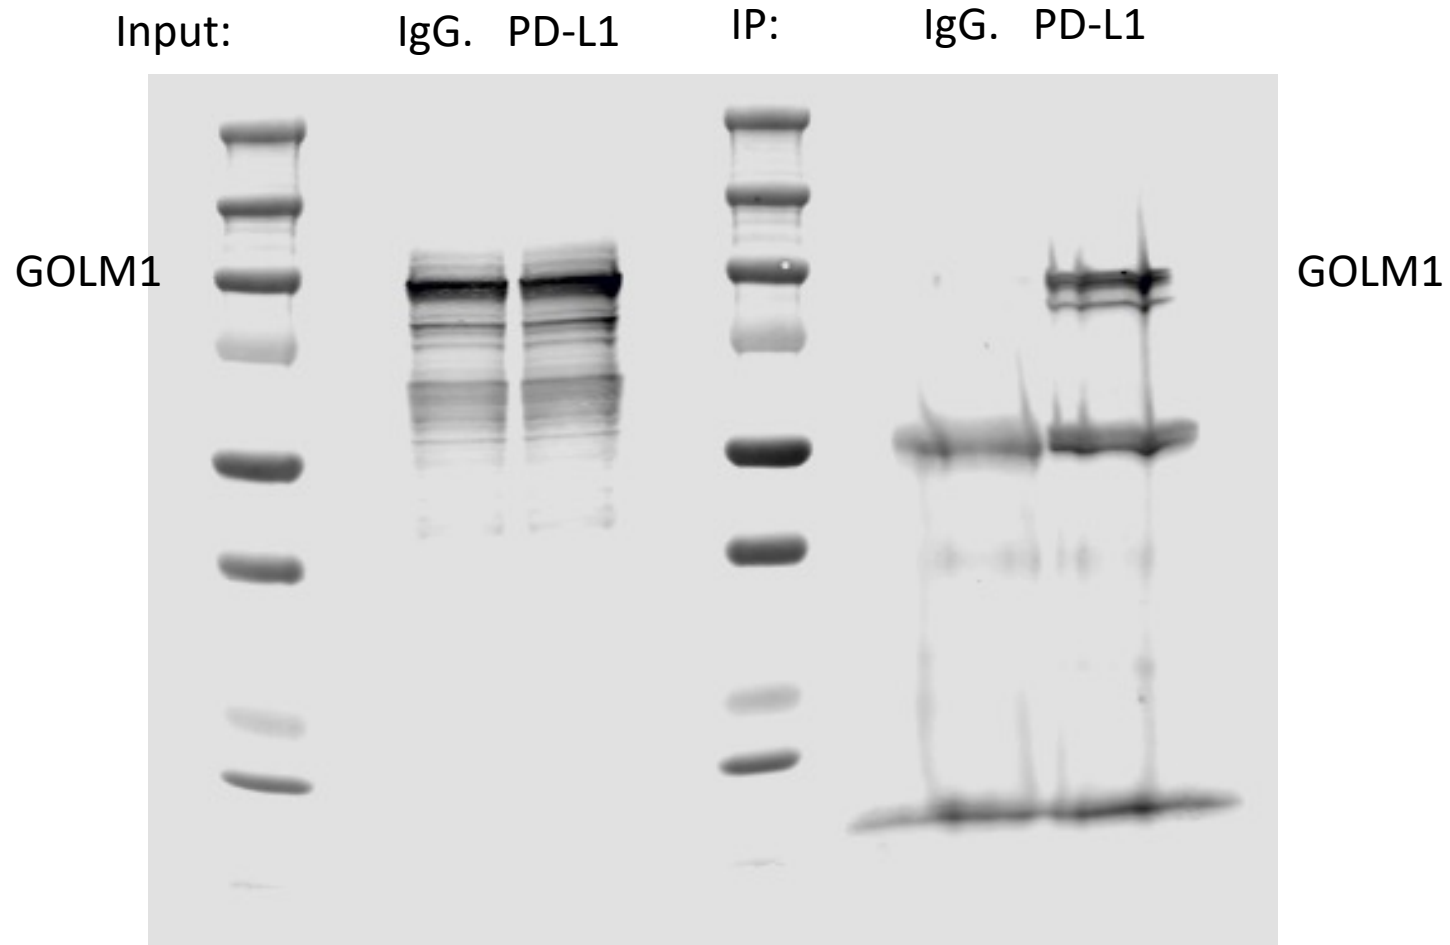

- HEK-293 cells were transfected with pEGFP-PD-L1 and GOLM1 vectors. 48 hours after transfection, immunoprecipitation using anti-PD-L1 or anti-IgG was performed on cell lysates and resolved using SDS-PAGE gel
- Probed with rabbit anti-GOLM1
- Ladder used: Precision plus duo

# Supplemental Figure 2A: No change in activation of GCN2 (p-GCN2) in CD1 mouse islets treated with varying doses of HC-5770

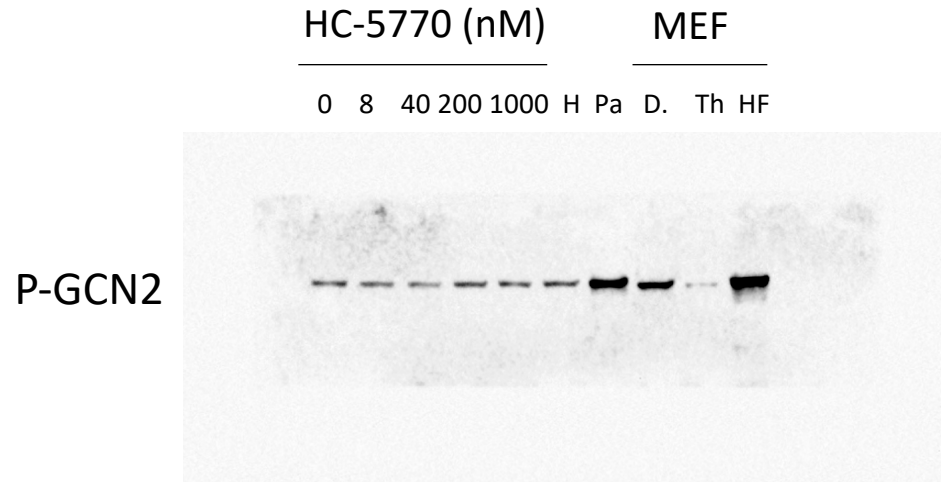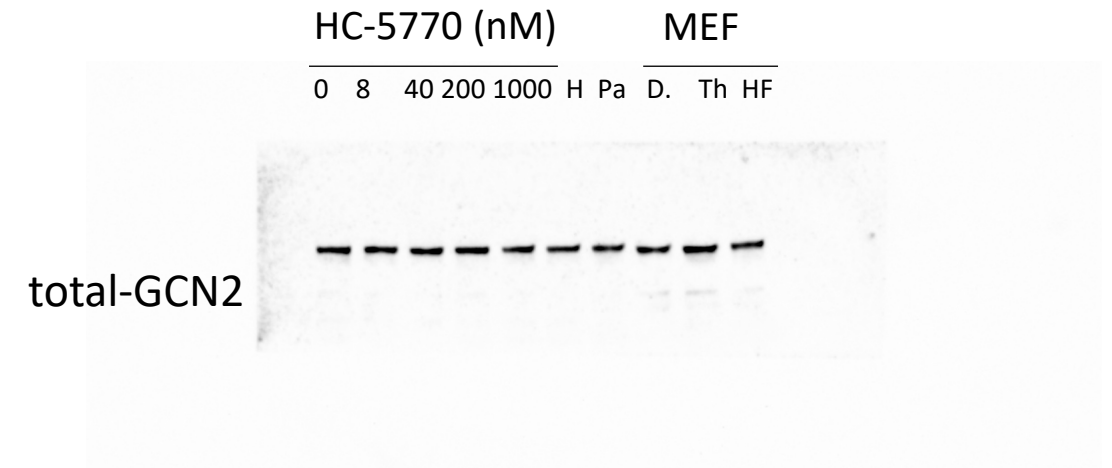

- Islets isolated from 9-week old CD1 mice were treated with HC-5770 (0.008 – 1.0  $\mu$ M), Harmine (10  $\mu$ M), or vehicle (DMSO) for 24 hours. Following treatment, islets were collected by centrifugation at 400 x g for 5 minutes, washed with PBS, and lysed in 50  $\mu$ l of 1% SDS Lysis Buffer containing Protease and Phosphatase Inhibitor Cocktail

## Control lysates:

- Lysates from whole pancreas from Balb/c mouse were prepared as described above.
- Mouse embryo fibroblasts (MEF) cells cultured in DMEM supplemented with 10% FBS were seeded into 100 mm dishes at 750,000 cells per well and allowed to attach overnight. Cells were treated with thapsigargin (1  $\mu$ M), halofuginone (100 nM), or vehicle (DMSO) for 6 hours. Cells were rinsed with PBS, and lysates were prepared 100  $\mu$ l of 1% SDS lysis buffer by scraping as described above.

# Supplemental Figure 4A: Human islets treated ISR inhibitors under inflammatory stress show a trend towards increase in PD-L1 levels

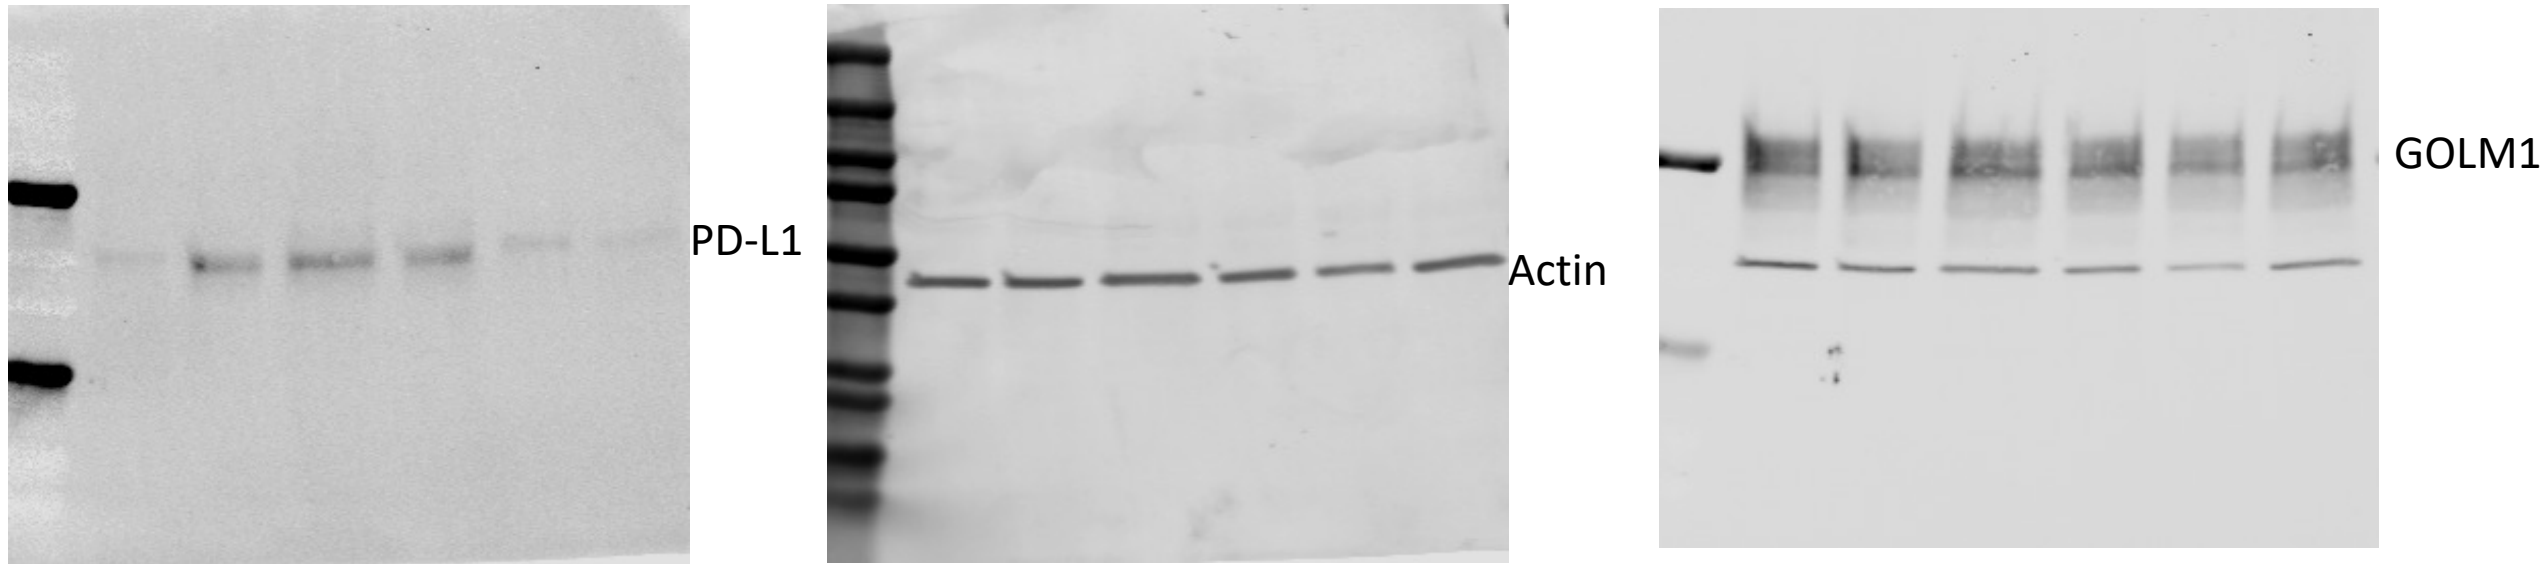

- Primary human donor islets were treated with vehicle or 250nM HC-5770 or 50nM ISRIB +/- proinflammatory cytokine (PIC) cocktail. Following 18-24 hours, cells were washed, and protein was collected using RIPA lysis buffer
- Probed with rabbit anti-PD-L1, mouse Actin
- Stripped and reprobed with rabbit GOLM1
- Ladder used: Chameleon duo

Supplemental Figure 4G: Pancreatic islets from NOD mice treated with HC-5770 for two weeks show an increase in

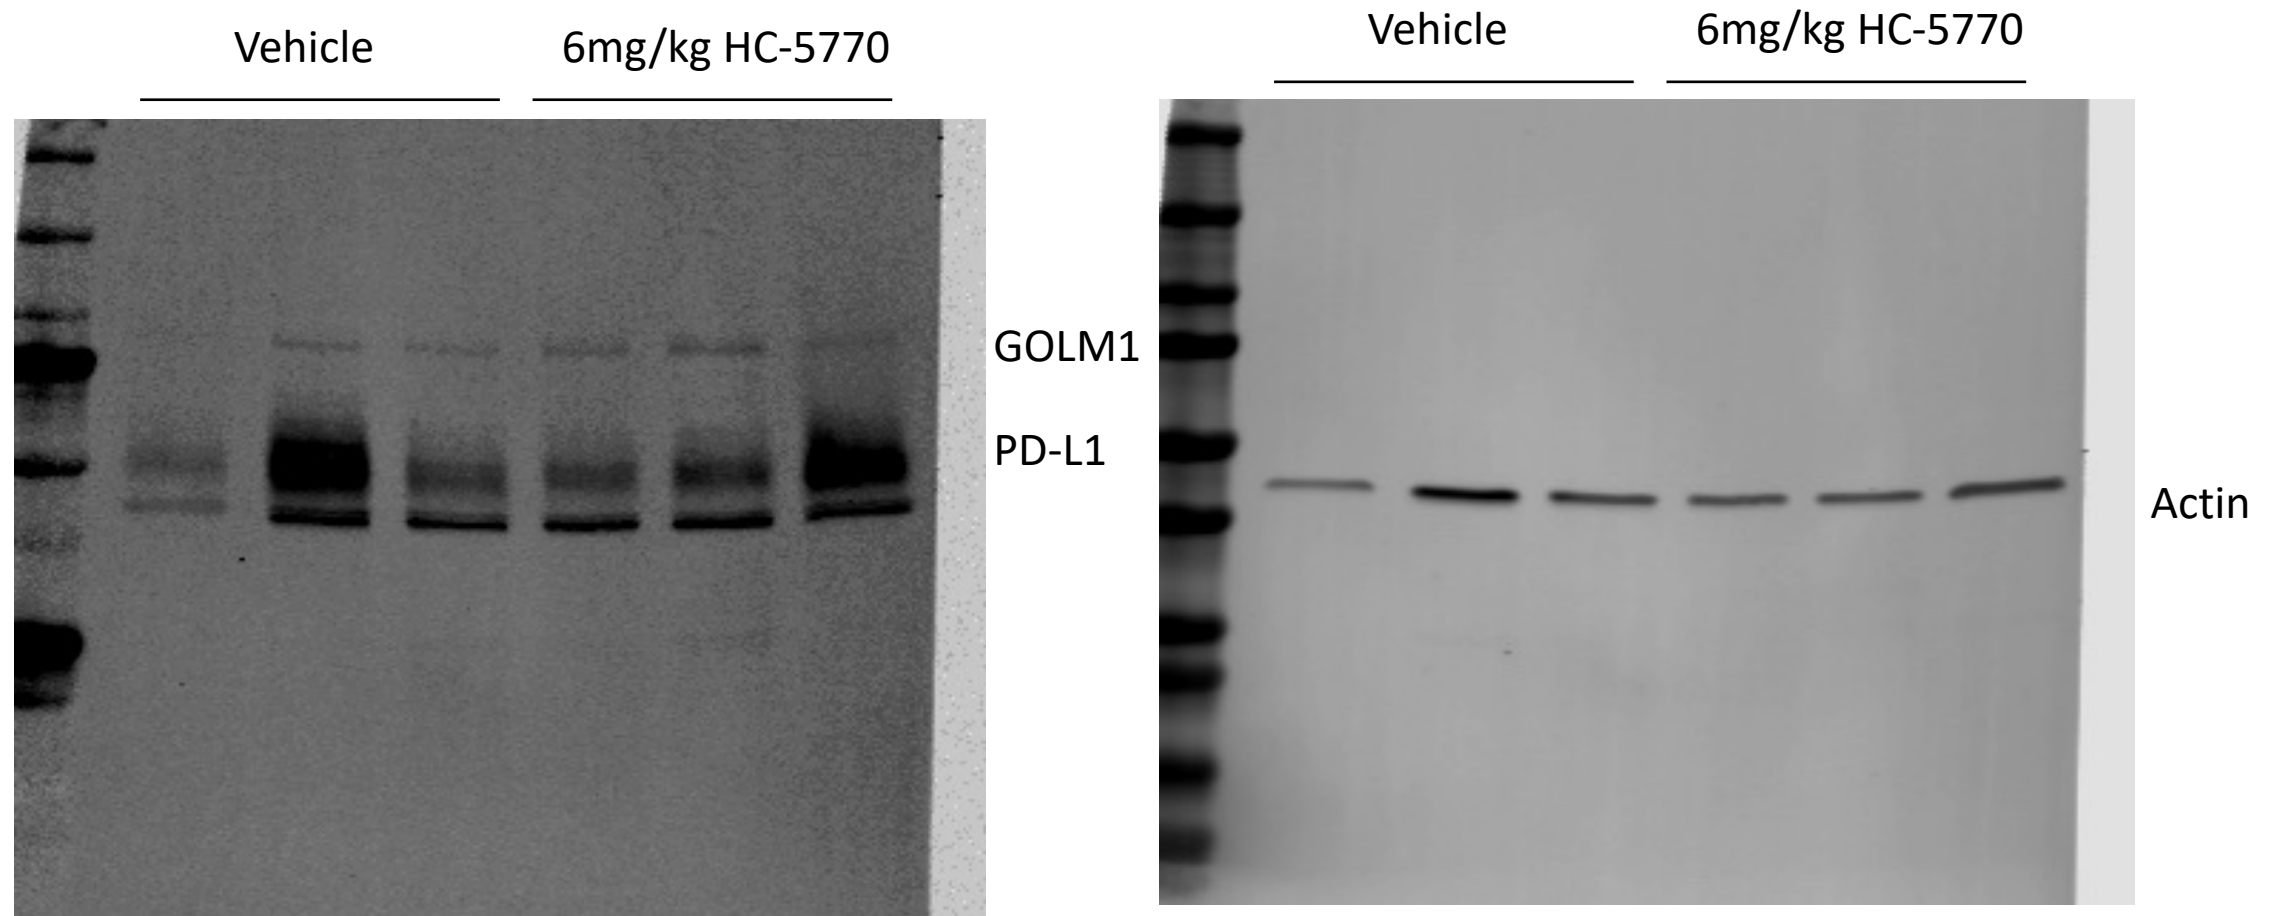

- 6-week-old NOD mice were treated with HC-5770 or vehicle for two weeks. Following which, islets were isolated and protein was collected using RIPA lysis buffer
- Probed with rabbit anti-PD-L1, anti-GOLM1, and mouse Actin
- Ladder used: Precision Plus Duo
